# Supplementary material
Source: PubMed Central journal article supplement (PMC4491145)

Figure S1

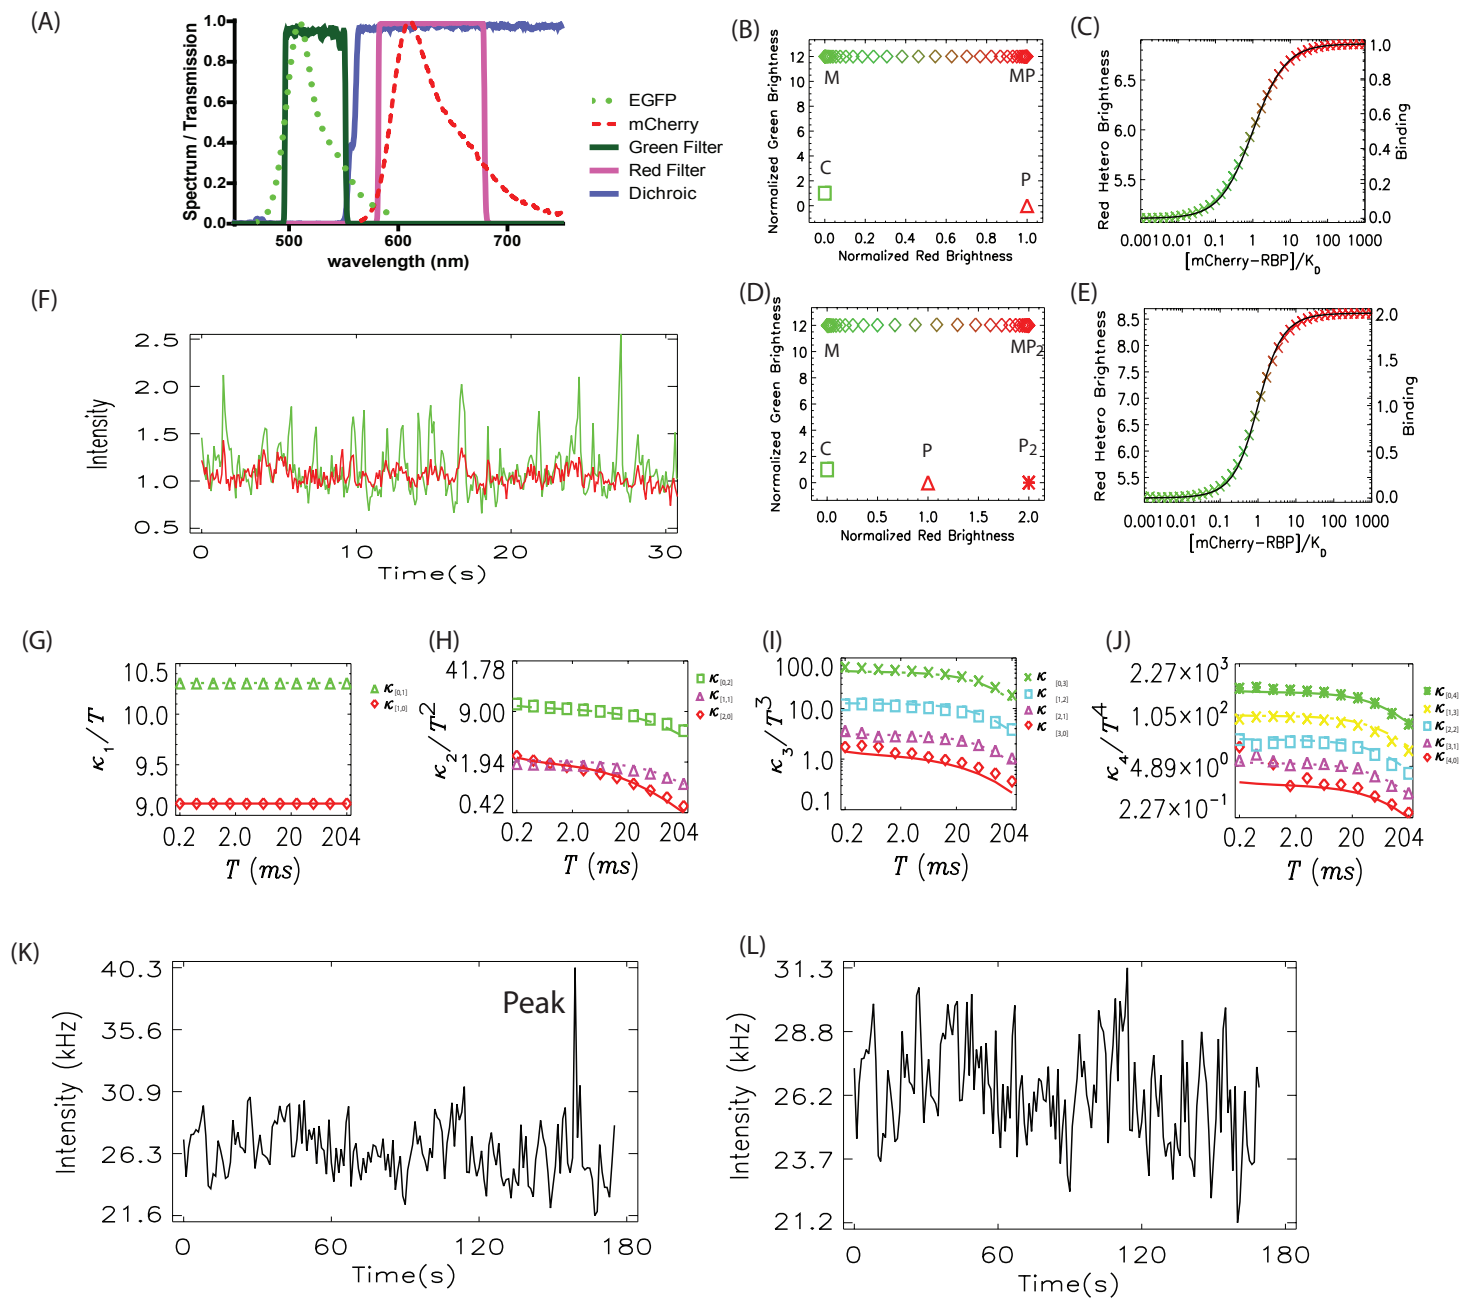

Supplement: NIHMS696737-supplement-1.pdf [file NIHMS696737-supplement-1.pdf]

Figure S3

(A)

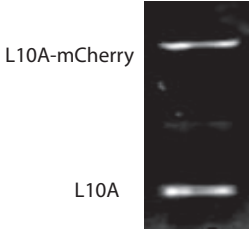

(B)

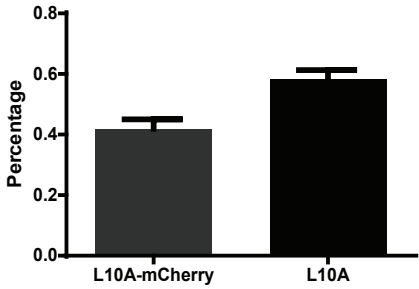

(C)

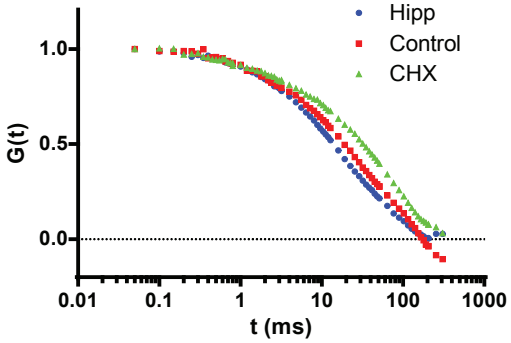

(D)

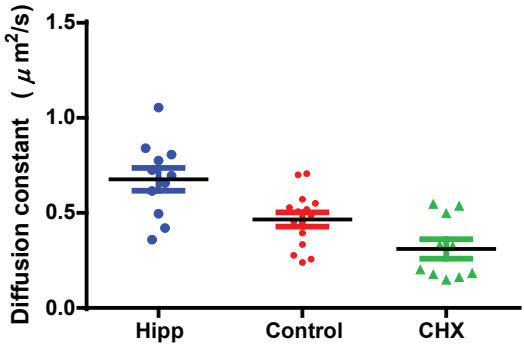

Supplement: NIHMS696737-supplement-3.pdf [file NIHMS696737-supplement-3.pdf]
